# Supplementary material for: Peroxisome proliferator-activated receptor-gamma: potential molecular therapeutic target for HIV-1-associated brain inflammation
Source: PubMed Central journal article supplement (PMC5591559; doi:10.1186/s12974-017-0957-8), 2017-09-08

**A****TNF $\alpha$  mRNA expression in frontal cortex  
(relative to saline control)**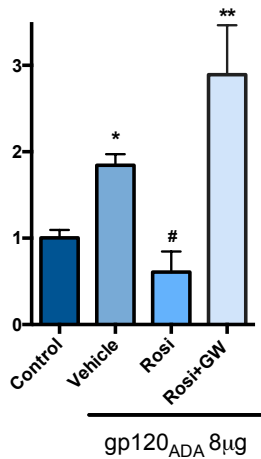**B****IL-1 $\beta$  mRNA expression in frontal cortex  
(relative to saline control)**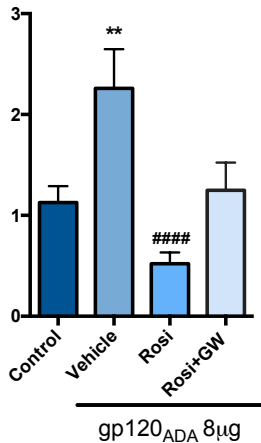**C****iNOS mRNA expression in frontal cortex  
(relative to saline control)**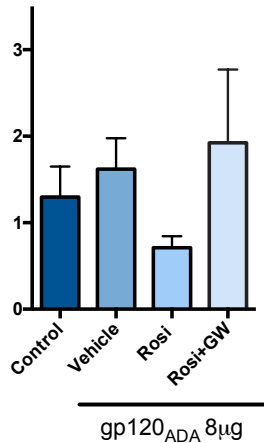

Supplement: 12974_2017_957_MOESM3_ESM.pdf [file 12974_2017_957_MOESM3_ESM.pdf]
