# Supplementary material for: Peroxisome proliferator-activated receptor-gamma: potential molecular therapeutic target for HIV-1-associated brain inflammation
Source: PubMed Central journal article supplement (PMC5591559; doi:10.1186/s12974-017-0957-8), 2017-09-08

**A**

**PPAR $\gamma$  mRNA expression  
in frontal cortex  
(relative to saline control)**

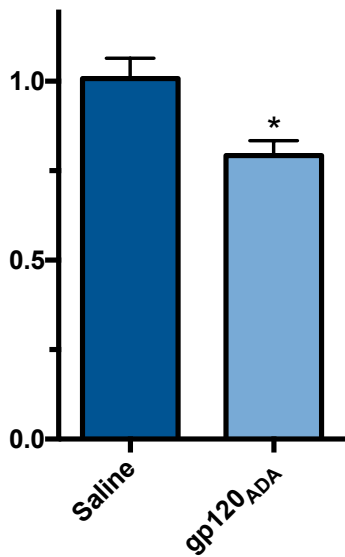**B**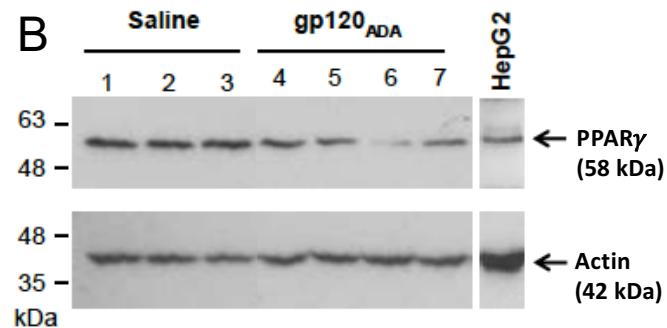

**PPAR $\gamma$  protein expression  
in frontal cortex  
(% control)**

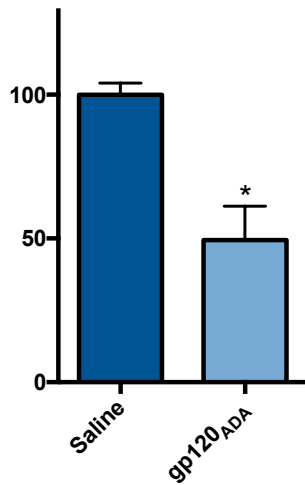

Supplement: 12974_2017_957_MOESM4_ESM.pdf [file 12974_2017_957_MOESM4_ESM.pdf]
